# Supplementary material
Source: PubMed Central journal article supplement (PMC7060741)
Supplement: pnas.1911540117.sapp.pdf [file pnas.1911540117.sapp.pdf]

1

## SUPPLEMENTARY INFORMATION

### 2 **SI Appendix**

3 In this appendix, we evaluate several potential explanations for our failure to detect  
4 negative effects of the AHTO on species richness. These include technical failures  
5 (edge effects), confounding effects (differences among treatments in the size of their  
6 species pools), a failure to satisfy the assumptions of models predicting negative  
7 effects of the AHTO (insufficient heterogeneity and insufficient dispersal among local  
8 communities), and insufficient time to obtain significant extinctions.

#### 9 *Edge effects*

10 Mesocosm experiments like the one conducted in our study are prone to edge effects  
11 (28). Indeed, our observations at the last year of the experiment have indicated that  
12 some containers were less dense at their margins, particularly at the periphery of the  
13 metacommunity. We therefore sampled the plants in each container in a manner that  
14 allowed us to test for edge effects on both species richness and species composition  
15 (Fig. S1). The results (Figs. S2, S3) indicated that neither richness, nor species  
16 composition showed any evidence for edge effects. We conclude that edge effects  
17 were not an issue in our experiment.

#### 18 *Differences among treatments in the size of their species pools*

19 Differences in habitat-specific species pools may introduce both negative and  
20 positive bias into estimated effects of heterogeneity on species richness. The  
21 'habitats' used in our experiment were known to differ in the size of their species  
22 pools (31), but our experiment was explicitly designed to avoid any correlation  
23 between habitat heterogeneity and species pool sizes, thereby preventing such bias  
24 (see 'Experimental design' in Methods).

## Testing the area-heterogeneity trade-off

### 25 *Insufficient heterogeneity*

26 The AHTO assumes that increasing heterogeneity reduces the average amount of  
27 area available per species. This assumption requires that heterogeneity should be  
28 measured as perceived by the species ('functional heterogeneity' sensu 56).  
29 Obviously, if species perceive different habitats as effectively similar (due to small  
30 differences in ecological conditions and/or large niche widths), increasing the number  
31 of habitats is not expected to have a significant effect on species richness.

32 In this experiment, we applied treatments ('habitats') that have previously been found  
33 to be important in determining the composition of the study species (47, 49, 50, 59,  
34 60). Ordination analyses based on the data from the homogeneous  
35 metacommunities indicated that the study species were sensitive to at least some of  
36 these treatments (Fig. S4). The largest compositional differences were found  
37 between shallow and deep soils, and between the NPK treatment and the other  
38 treatments under deep soil conditions (Fig. S4). Moreover, our results show that the  
39 magnitude of compositional dissimilarity among the eight local communities *within*  
40 metacommunities (calculated using the Jaccard index of dissimilarity) increased  
41 significantly with increasing heterogeneity (Fig. S5). This result provides a clear  
42 evidence that increasing heterogeneity increased the range of ecological conditions  
43 as perceived by the study species.

### 44 *Insufficient dispersal*

45 Another assumption of the AHTO is that individuals are able to disperse among  
46 habitats. It is therefore possible that our failure to detect significant negative effects of  
47 the AHTO on species richness reflects lack or insufficient seed dispersal among local  
48 communities.

## Testing the area-heterogeneity trade-off

49 To test this possibility, we compared the number of species in isolated local  
50 communities (communities in containers of 50x50cm that were blocked for dispersal)  
51 with that of local communities of the same habitat that were embedded within  
52 heterogeneous metacommunities with  $H=8$  (i.e., communities that were open to  
53 dispersal from all other habitats in the metacommunity). Isolated local communities  
54 were available for three treatments - Control, NPK, and Clipping, all under deep soil  
55 conditions. The results (Fig. S6) showed that local communities embedded within  
56 heterogeneous metacommunities had significantly more species than isolated local  
57 communities of the same size and treatment. Moreover, for metacommunities with  
58 deep soil, local communities embedded within heterogeneous metacommunities had  
59 significantly more species than local communities embedded within uniform  
60 metacommunities of the same habitat (Fig S7). These findings confirm that both  
61 habitat heterogeneity *and* dispersal among habitats were highly effective in our  
62 experimental system.

### 63 *Insufficient extinctions*

64 The proximate process responsible for the negative effect of the AHTO on species  
65 richness is species extinctions. Thus, the simplest explanation for our failure to detect  
66 a negative effect of the AHTO on species richness might be that the duration of the  
67 experiment was not sufficiently long to obtain enough extinctions. The ability of many  
68 species to maintain a viable seed bank in the soil contributes to the plausibility of this  
69 explanation.

70 However, a comparison of the average number of species observed in individual  
71 containers between the first year and the last year of the experiment revealed a  
72 strong and highly significant decline in richness (from an average of 28.12 to 11.29  
73 species per container, Fig 5a). This decline (60%) confirms that the lack of a negative  
74 effect of the AHTO on species richness in our experiment could not be attributed to  
75 lack of extinctions.

## Testing the area-heterogeneity trade-off

76 These overall results indicate that our failure to detect a negative effect of the AHTO  
77 on species richness cannot be explained by edge effects, differences among habitats  
78 in their species pools, failure to generate effective ('functional') heterogeneity, lack of  
79 among-habitat dispersal, or insufficient extinctions.

80

81

82

83

84 **SI Figures**

85 **Figure S1.** Design of data collection in the mesocosm metacommunities at the last  
86 (fourth) year of the experiment. Species presence-absence data were taken  
87 separately in the center (green squares) and the periphery (brown area) of each  
88 container in each metacommunity. All analyses except for calculation of extinction  
89 rates were performed using the data collected at the centers of the containers.  
90 Values in container centers indicate the number of outer edges in the relevant  
91 container (used for testing edge effects, see Figs. S2, S3).

92 **Figure S2.** Effect of container position within the metacommunity (expressed by the  
93 number of outer edges, see Fig. S1) on the number of species at the center  
94 (25x25cm area) of the container. A separate analysis was performed for  
95 metacommunities representing each of the eight 'habitats'. For each metacommunity  
96 we calculated the average number of species in containers of each edge category  
97 and these values were averaged over all metacommunities subjected to the relevant  
98 habitat. Error bars indicate means  $\pm$  2SE. The effect of edge category was not  
99 significant ( $P > 0.35$ ) in a two-way ANOVA with habitat type and number of outer  
100 edges as main effects.

101 **Figure S3.** Effect of container position within the metacommunity (expressed by the  
102 number of outer edges, see Fig. S1) on species composition at the center (25x25cm  
103 area) of the container. Results shown are NMDS ordination analyses based on the  
104 Jaccard index of dissimilarity. Each analysis focuses on 48 containers (six  
105 homogeneous metacommunities with eight containers per metacommunity). Colors  
106 indicate the number of outer edges in the container (see Fig. S1).

107

## Testing the area-heterogeneity trade-off

108 **Figure S4.** NMDS ordination (based on the Jaccard index of similarity) of species  
109 composition in all containers of the homogeneous metacommunities (eight 'habitats'  
110 x six metacommunities per habitat x 8 containers per metacommunity = 384 local  
111 communities). Colors indicate habitat types. Triangles are centroids of specific  
112 habitats (marked by their color), error-bars indicate means  $\pm 2$  SE of the NMDS axes.  
113 Note that in many cases a single dot represents multiple containers.

114 **Figure S5.** Effect of habitat heterogeneity on compositional dissimilarity *among local*  
115 *communities within metacommunities*. For each metacommunity we calculated the  
116 mean Jaccard index of dissimilarity among all possible pairs of containers and  
117 averaged the resulting means over all metacommunities subjected to the relevant  
118 level of heterogeneity. Note that, although values of the Jaccard index within a  
119 metacommunity are not independent, different metacommunities can be treated as  
120 independent observations ( $F_{3,91} = 5.93$ ,  $P < 0.001$ , One-way ANOVA).

121 **Figure S6.** Differences in species richness between isolated local communities (no  
122 dispersal) and local communities of the same size and same habitat embedded  
123 within heterogeneous metacommunities of  $H=8$ . Isolated local communities were  
124 available for three treatments - Control, Clipping, and NPK under deep soils. A two-  
125 way factorial ANOVA with differences among isolated and non-isolated local  
126 communities and treatment as main effects showed that both effects were highly  
127 significant (Dispersal:  $F_{1,75} = 12.9$ ,  $P < 0.001$ ; Treatment:  $F_{1,75} = 35.7$ ,  $P < 0.001$ ).

128 **Figure S7.** Differences in species richness between local communities embedded  
129 within homogeneous metacommunities and local communities of the same size and  
130 same habitat embedded within heterogeneous metacommunities of  $H=8$  ( $n = 48$  and  
131 11 per habitat type, respectively). A separate comparison was performed for each  
132 type of habitat. Error bars indicate  $\pm 2$ SE.

133

134

Fig. S1

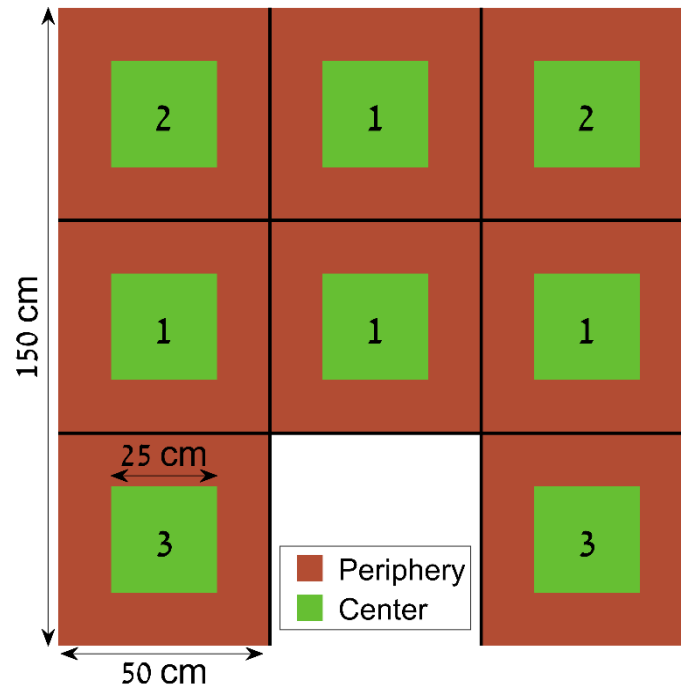

135

136

137

138

Fig. S2

139

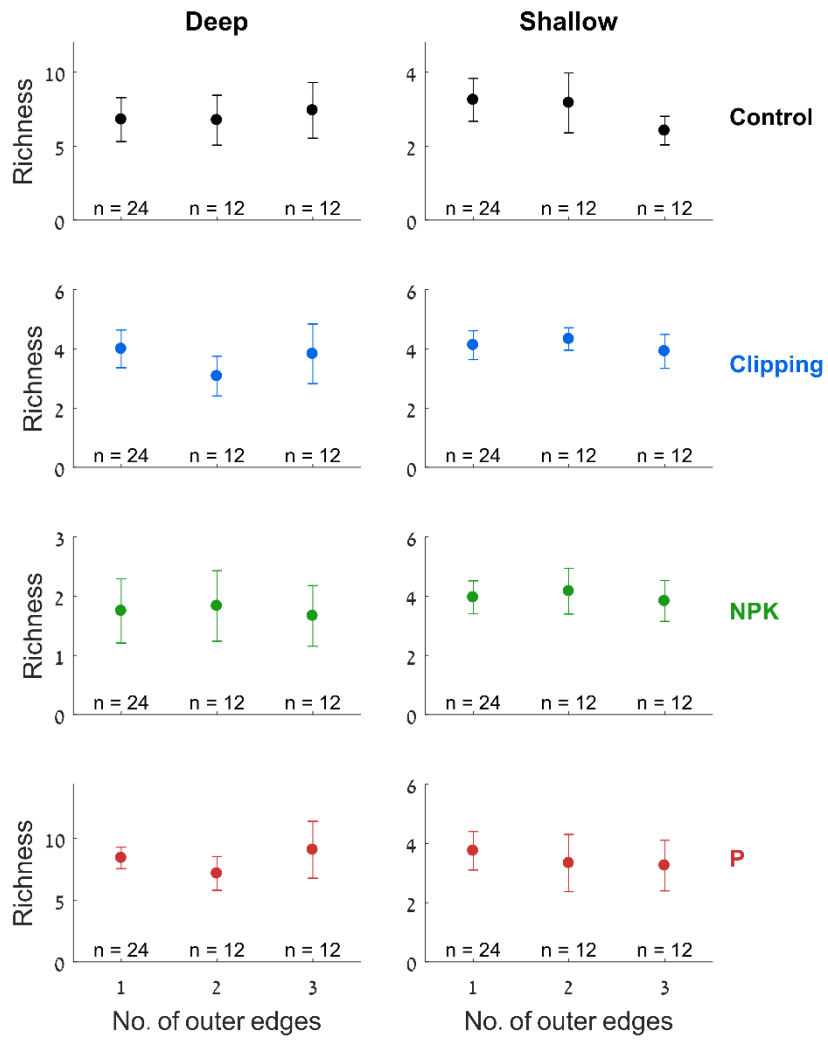

140

141



142

Fig. S3

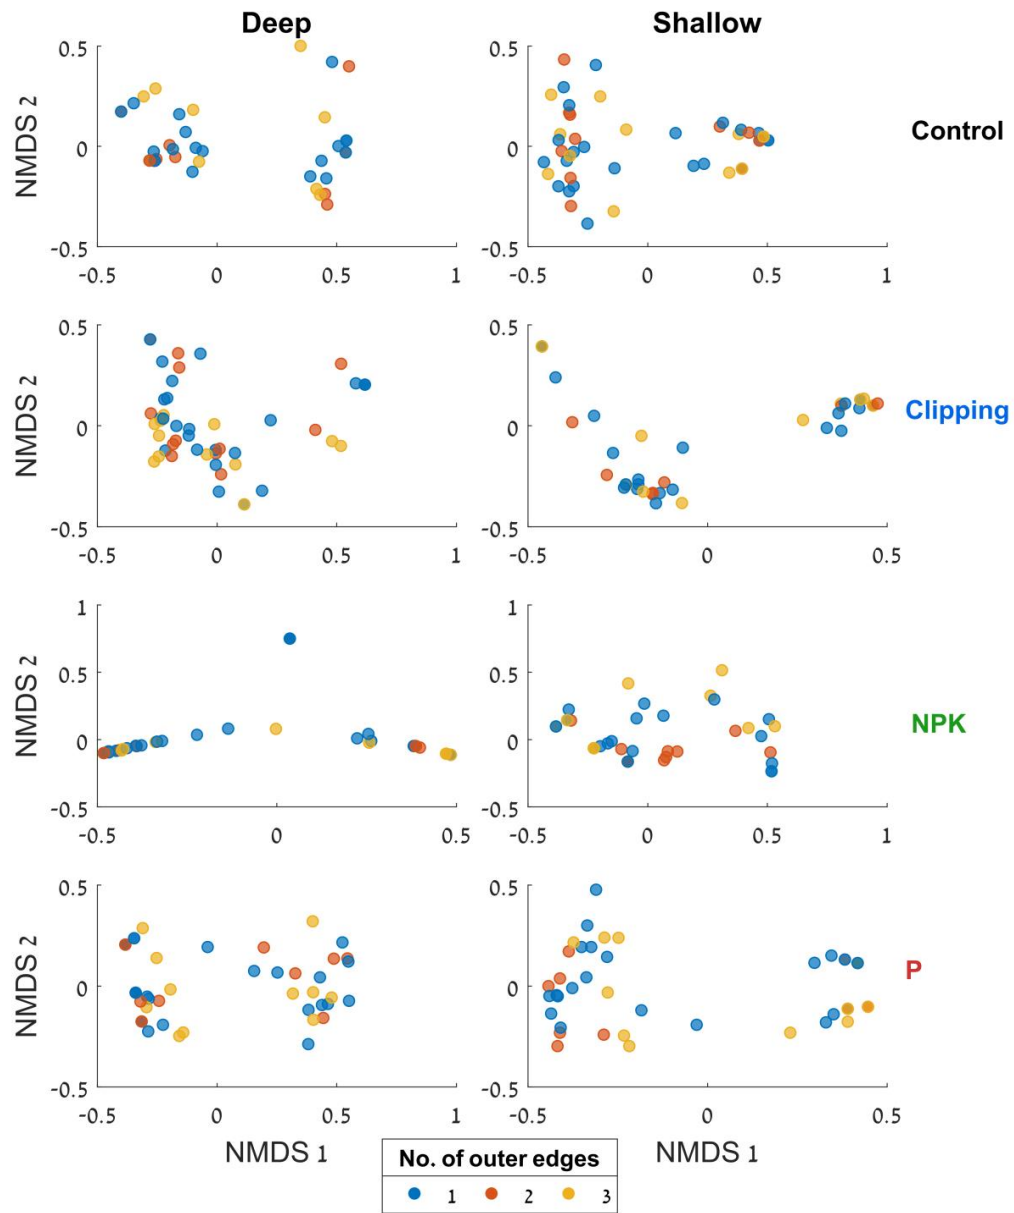

143

144

145

Fig. S4

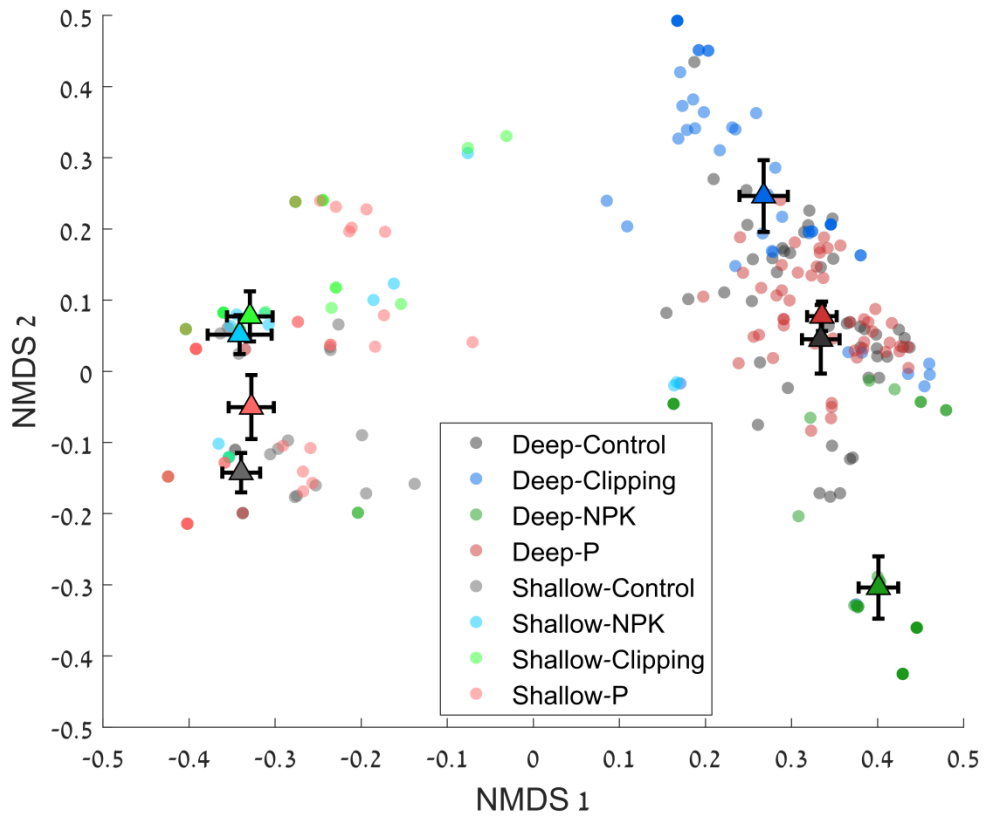

146

147

148

**Fig. S5**

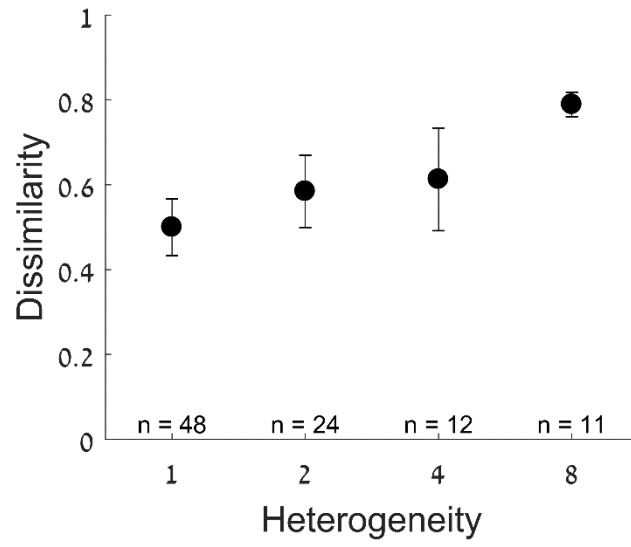

149

150

151

152

Fig. S6

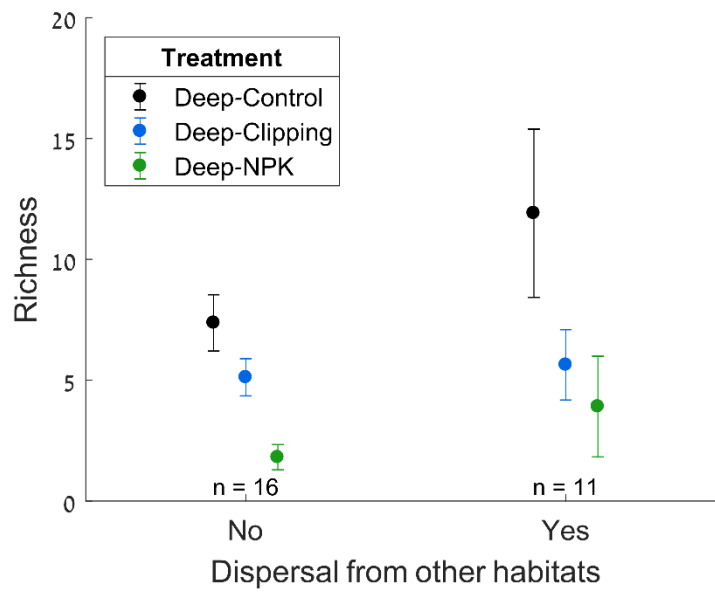

153

154

155

Fig. S7

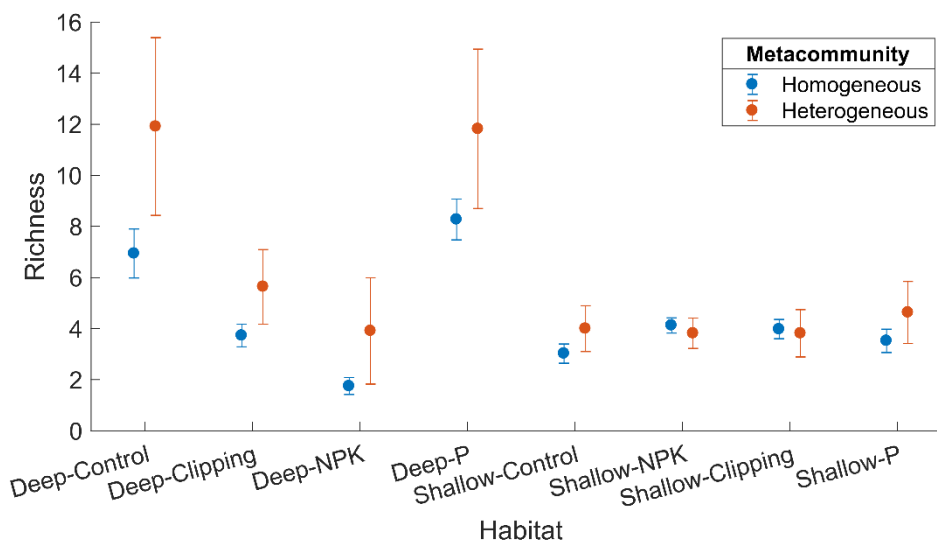

156
